# Supplementary material
Source: publisher site journal article supplement (https://www.dovepress.com/article/406375)
Supplement: Supplementary file 1 [file get_supplementary_file.php]

**Supplementary table1** Demographics and Clinical Characteristics of Patients with Severe Pneumonia

| Demographics or  Characteristic | Total | Patients with PIBO n=78 | Patients Non-PIBO n=150 | *P-*value |
| --- | --- | --- | --- | --- |
| Gender, N (%) |  |  |  | 0.362 |
| Male | 122 | 45 (57.7) | 77 (51.3) |  |
| Female | 106 | 33 (42.3) | 73 (48.7) |  |
| Age (months) |  |  |  | < 0.001 |
| Median | 36 | 14.5 | 48 |  |
| IQ Range | 14-72 | 8-28 | 27.5-84 |  |
| Length of stay |  |  |  | < 0.001 |
| Median | 11 | 15 | 10 |  |
| IQ Range | 8-14 | 11-23 | 7-13 |  |
| Pleural effusion, N (%) |  |  |  | 0.069 |
| Yes | 54 | 24 (30.8) | 30 (20.0) |  |
| No | 174 | 54 (69.2) | 120 (80.0) |  |
| Multiple lobes, N (%) |  |  |  | 0.025 |
| Yes | 144 | 57 (73.1) | 87 (58.0) |  |
| No | 84 | 21 (26.9) | 63 (42.0) |  |
| Emphysema, N (%) |  |  |  | < 0.001 |
| Yes | 40 | 27 (34.6) | 13 (8.7) |  |
| No | 188 | 51 (65.4) | 137 (91.3) |  |
| Short breath, N (%) |  |  |  | < 0.001 |
| Yes | 31 | 26 (33.3) | 5 (3.3) |  |
| No | 197 | 52 (66.7) | 145 (96.7) |  |
| Mechanical ventilation, N (%) |  |  |  | < 0.001 |
| Yes | 32 | 30 (38.5) | 2 (1.3) |  |
| No | 196 | 48 (61.5) | 148 (98.7) |  |
| ESR (mm/h) |  |  |  | 0.024 |
| Median | 39.5 | 32.5 | 44 |  |
| I Q Range | 17.3-65.8 | 9.8-63 | 21.5-68.3 |  |
| DD dimer (102 mg/L) |  |  |  | 0.319 |
| Median | 0.49 | 0.63 | 0.46 |  |
| IQ Range | 0.3-1.04 | 0.27-1.22 | 0.31-0.79 |  |
| WBC (10^9/L) |  |  |  | 0.669 |
| Median | 8.16 | 8.31 | 8.15 |  |
| IQ Range | 6.26-11.2 | 6.03-12.33 | 6.51-10.4 |  |
| Neutropil (%) |  |  |  | 0.011 |
| Median | 0.57 | 0.62 | 0.55 |  |
| IQ Range | 0.43-0.70 | 0.45-0.78 | 0.41-0.68 |  |
| PLT (10^9/L) |  |  |  | 0.289 |
| Median | 311 | 341 | 302 |  |
| IQ Range | 238-389 | 245-394 | 237-386 |  |
| EOS (%) |  |  |  | < 0.001 |
| Median | 40 | 1 | 100 |  |
| IQ Range | 20-160 | 0-20 | 20-200 |  |
| CRP (mg/L) |  |  |  | 0.380 |
| Median | 10 | 8 | 12.5 |  |
| IQ Range | 5-34.8 | 5-33.8 | 5-35 |  |
| PCT (ng/ml) |  |  |  | 0.628 |
| Median | 0.17 | 0.16 | 0.18 |  |
| IQ Range | 0.06-0.41 | 0.05-0.42 | 0.07-0.37 |  |
| LDH (U/L) |  |  |  | 0.098 |
| Median | 322 | 355 | 314 |  |
| IQ Range | 269-404 | 268-487 | 270-382 |  |
| ALB (g/L) | 41.2±5.9 | 42.1±7.2 | 40.8±5.1 | 0.126 |
| Ferritin (ng/mL) |  |  |  | 0.002 |
| Median | 93.1 | 152.1 | 91 |  |
| IQ Range | 58.2-161.5 | 57.2-369.1 | 57.9-130.4 |  |
| ALT (U/L) |  |  |  | 0.004 |
| Median | 14 | 16.5 | 13 |  |
| IQ Range | 11-21.8 | 12-26 | 11-19.3 |  |
| HAdV, N (%) |  |  |  | < 0.001 |
| Yes | 55 | 38 (48.7) | 17 (11.3) |  |
| No | 173 | 40 (51.3) | 133 (88.7) |  |
| Co-infection, N (%) |  |  |  | < 0.001 |
| Yes | 102 | 52 (66.7) | 50 (33.3) |  |
| No | 126 | 26 (33.3) | 100 (66.7) |  |
| MP-Ab, N (%) |  |  |  | 0.082 |
| Yes | 132 | 39 (50.0) | 93 (62.0) |  |
| No | 96 | 39 (50.0) | 57 (38.0) |  |
| IL-8 (10-2 pg/ml) |  |  |  | 0.006 |
| Median | 16.42 | 19.5 | 11.3 |  |
| IQ Range | 3.6-29.12 | 15.8-31.1 | 2.4-27.9 |  |
| IL-1β (10-2 pg/ml) |  |  |  | 0.868 |
| Median | 4.99 | 17.9 | 4.2 |  |
| IQ Range | 2.44-18.1 | 2.1-18.1 | 2.4-22.3 |  |
| IL-2 (102 pg/ml) |  |  |  | < 0.001 |
| Median | 2.44 | 1.9 | 3.2 |  |
| IQ Range | 1.9-3.84 | 0.15-2.09 | 2.44-4.79 |  |
| IL-6 (102 pg/ml) |  |  |  | 0.072 |
| Median | 9.91 | 38.4 | 9.2 |  |
| IQ Range | 3.17-38.4 | 0.47-38.4 | 3.32-25.9 |  |
| IL-10 (102 pg/ml) |  |  |  | 0.255 |
| Median | 2.71 | 2.8 | 2.6 |  |
| IQ Range | 2.44-3.57 | 1.78-2.88 | 2.44-3.82 |  |
| IL-4 (102 pg/ml) |  |  |  | 0.002 |
| Median | 2.77 | 3.6 | 2.5 |  |
| IQ Range | 2.44-3.6 | 2.97-3.6 | 2.44-3.26 |  |
| IL-5 (102 pg/ml) |  |  |  | < 0.001 |
| Median | 4.39 | 6.7 | 3.82 |  |
| IQ Range | 2.44-6.7 | 3.43-6.7 | 2.44-5.17 |  |
| IL-12p70 (102 pg/ml) |  |  |  | 0.001 |
| Median | 2.84 | 3.3 | 2.67 |  |
| IQ Range | 2.44-3.3 | 3.08-3.3 | 2.44-3.34 |  |
| IL-17A (102 pg/ml) |  |  |  | 0.020 |
| Median | 3.33 | 3.9 | 3.18 |  |
| IQ Range | 2.44-3.9 | 2.76-3.9 | 2.44-4.12 |  |
| TNF-α (102 pg/ml) |  |  |  | 0.615 |
| Median | 4.31 | 7.98 | 4.3 |  |
| IQ Range | 2.44-8.18 | 0.96-8.18 | 2.44-8.99 |  |
| γ-INF (102 pg/ml) |  |  |  | < 0.001 |
| Median | 13.47 | 65.9 | 10.26 |  |
| IQ Range | 5.66-65.9 | 13.8-65.9 | 4.02-26.5 |  |
| IgG | 9.35±3.13 | 9.09±3.26 | 9.48±3.07 | 0.373 |
| IgA |  |  |  | < 0.001 |
| Median | 1.05 | 0.97 | 1.23 |  |
| IQ Range | 0.64-1.685 | 0.49-1.24 | 0.76-1.83 |  |
| IgM |  |  |  | 0.219 |
| Median | 1.23 | 1.21 | 1.25 |  |
| IQ Range | 0.865-1.63 | 0.85-1.49 | 0.89-1.65 |  |
| IgE |  |  |  | 0.079 |
| Median | 99.1 | 150.5 | 78.4 |  |
| IQ Range | 27.4-282.8 | 34.6-368.4 | 25.9-257.0 |  |
| CD3+ % | 58.5±19.1 | 46.9±25.6 | 64.6±10.4 | < 0.001 |
| CD8+ % | 23.1±9.1 | 19.4±11.7 | 24.9±6.7 | < 0.001 |
| CD4+ % |  |  |  | < 0.001 |
| Median | 32.4 | 24.8 | 34.5 |  |
| IQ Range | 25.2-39.1 | 18.8-34.7 | 28.5-40.6 |  |
| CD19+ % |  |  |  | 0.132 |
| Median | 21.7 | 21.1 | 21.7 |  |
| IQ Range | 15.9-28.4 | 13.5-28.4 | 16.5-28.6 |  |
| CD16+56+/CD3- ( %) |  |  |  | 0.943 |
| Median | 8.4 | 9.0 | 8.1 |  |
| IQ Range | 4.7-12.4 | 4.3-13.2 | 4.9-12.2 |  |
| CD4+/CD8+ ( %) |  |  |  | 0.027 |
| Median | 1.3 | 1.3 | 1.39 |  |
| IQ Range | 1.0-1.7 | 0.9-1.6 | 1.1-1.8 |  |
| CD3+ *10^9/L |  |  |  | < 0.001 |
| Median | 1.5 | 1.3 | 1.7 |  |
| IQ Range | 1.0-2.4 | 0.7-2.0 | 1.2-2.6 |  |
| CD8+ *10^9/L |  |  |  | 0.001 |
| Median | 0.59 | 0.49 | 0.65 |  |
| IQ Range | 0.35-0.95 | 0.26-0.73 | 0.41-0.99 |  |
| CD4+ *10^9/L |  |  |  | < 0.001 |
| Median | 0.79 | 0.64 | 0.89 |  |
| IQ Range | 0.53-1.30 | 0.28-1.02 | 0.59-1.40 |  |
| Lym *10^9/L |  |  |  | 0.001 |
| Median | 2.46 | 2.14 | 2.69 |  |
| IQ Range | 1.66-3.67 | 1.18-2.92 | 1.90-3.96 |  |
| CD19+ *10^9/L |  |  |  | 0.316 |
| Median | 0.61 | 0.58 | 0.62 |  |
| IQ Range | 0.32-1.02 | 0.32-0.92 | 0.32-1.05 |  |
| CD16+56+/CD3-*10^9/L |  |  |  | 0.026 |
| Median | 0.21 | 0.19 | 0.24 |  |
| IQ Range | 0.13-0.32 | 0.10-0.25 | 0.13-0.34 |  |

PIBO post-infectious bronchiolitis obliterans, ESR erythrocyte sedimentation rate, WBC White blood cell, PLT platelet count, EOS eosinophil, CRP C-reactive protein, PCT procalcitonin, LDH lactate dehydrogenase, ALB albumin, ALT alanine transaminase, HAdV human adenoviral infection, MP-Ab Mycoplasma pneumoniae antibody, IL-8 Interleukin-8, TNF-α tumor necrosis factor α, γ-INF γ-interferon, Ig G Immunoglobulin G, IQR Interquartile range
